# Enabling stable coexistence by modifying the environment

Alejandro Pastor<sup>1</sup>, Juan Carlos Nuño<sup>2,\*</sup>, José Olarrea<sup>1</sup>, Javier de Vicente<sup>1</sup>,

<sup>1</sup> Department of Applied Mathematics in Aerospace Engineering. Universidad Politécnica de Madrid - ETSIAE, Madrid, Spain

<sup>2</sup> Department of Applied Mathematics. Universidad Politécnica de Madrid, Madrid, Spain

\* juancarlos.nuno@upm.es

## Abstract

In this work coexistence is studied using a model based on two classical population models: the quasispecies of Eigen [1] and the daisyworld presented by Watson and Lovelock [2]. It is assumed that species are able to modify the environment. We show that this ability enables the coexistence between, at most, two species in equilibrium. Given an initial population, the problem arises as to determine which of the many equilibrium populations, i.e. extinction, only one species or coexistence of two species, will be reached as a function of the species characteristics, specifically their capacity to modify the environment and the optimal growth rate. These results are obtained under general assumptions, which broadens its applicability to other fields as evolutionary biology and social sciences.

## 1 Introduction

The question of whether an initial population formed by different species will persist on time is of great relevance in Ecology and Evolutionary Biology [3–5]. However, to get conclusive results seems to be elusive because of the so many factors that are involved in the dynamic behavior of the population [6]. Besides, the individual properties of the species have to be confronted with initial and boundary conditions.

From a dynamical point of view, this question is translated to which asymptotic equilibrium the population will attain when multiple stable equilibria exist. Classical qualitative analysis, using local properties of equilibria, is not enough to solve this question [7, 8]. Finding its solution requires a global approach that considers the properties of all the species as well as the possible interactions among them and the influence of the environment. Unfortunately, despite the large number of papers devoted to study the relationship between biodiversity and stability in ecosystems [3, 5], there are no standard techniques to analyse this kind of complex systems [9].

Our model is founded on two classical models: the Quasispecies model introduced by Eigen in the early seventies [1] and the so called Daisyworld model presented by Watson and Lovelock in 1983 to study the homeostatic properties of ecosystems [2, 10]. From the first, we use the dynamic description, the concept of species fitness and the population constraint that brings about a selective process. From the second, the hypothesis that the individuals have the ability to influence their environment. The model we present here belongs to a different category of those where the environment changes independently of the population (see, for instance, [11, 12])

There are several examples where the species ability to modify their environment are specially relevant. Tumor cells are able to modify the surrounding tissues by segregating chemical substances that increase the fitness of malign cells [13]. Soil modification by microbial communities is being reported as one of the main driving factors of these ecosystems [14]. Finally, climate change caused anthropogenically, i.e. induced by human actuations, constitutes a dramatic example of the effect of modifying the temperature by the species that inhabit the planet [15].

In this paper we study a population of replicators that are able to modify their environment [16]. The environment is here described by an unique scalar variable, that we will call temperature. We assume that species fitness depend on this temperature that changes over time as a function of the population distribution. Maximum fitness for each species is reached at a particular optimal temperature value, decreasing when temperature departs from this value. Species influence on temperature can be either positive or negative and it is not coupled with their optimal temperature. Besides, total population is bounded by a carrying capacity of the system. As a consequence, the initial population undergoes a selective process that ends in an equilibrium population formed by the survival species, if any.

It is worth noting that, as a consequence of the feedback between the population and its environment, the fitness of each species varies with time. There is no proper way to rank the species out of the particular context they are placed.

For the sake of clarifying, the main assumptions of the model are listed below:

- (i) A carrying capacity exists that bounds the total population,
- (ii) The environment is described by a unique scalar function, its temperature, that is a function of time,
- (iii) The influence of each species on the temperature is proportional to its population size,
- (iv) The fitness of each species is a symmetrical function of temperature with a single peak at its optimal temperature,
- (v) Species only interact with each other indirectly through this temperature and the resource (space) constraint.

The next section presents in detail the mathematical model. Results concerning with the stability analysis of population of low diversity are obtained in the third section. Fourth section presents the results obtained from the simulations of populations with large initial biodiversity. We conclude and discuss these results, as well as their implications, in the final section.

## 2 The mathematical model

We consider a population of error-free self-replicative species (replicators)  $I_i$  for  $i = 1, \dots, S$ . The size of the total population at time  $t$  is  $N(t)$  and, can be determined as the sum of the population of each phenotype  $N_i(t)$ :

$$N(t) = \sum_{i=1}^S N_i(t) \quad (1)$$

Species  $I_i$  has associated a fitness function  $f_i$  that can be described by two real numbers:  $T_i$  and  $\alpha_i$ . The first one,  $T_i$ , stands for its optimal growth temperature whereas,  $\alpha_i$  denotes its influence on the environment. Both parameters,  $T_i$  and  $\alpha_i$ , give

**Fig 1.** Examples of possible  $f(x)$  in fitness equation (2).

a measure of the survival probability of  $I_i$  in each generation. The relative fitness  $f_i$  depends on the rest of species of the population through the global temperature  $T$ . In particular, we assume that the relative fitness of copy  $I_i$  is given by

$$f_i(T(t)) = r_i f(|T(t) - T_i|) \quad (2)$$

where  $r_i$  is a non-negative parameter and  $f(x)$  is a function that exhibits an unique maximum at  $x = 0$  and decreases monotonically to 0 as  $x \rightarrow \infty$  (see Figure 1).

The intensive parameter  $T$  characterizes the environment. We suppose that each species  $I_i$  has a linear influence on  $T$ , weighted by the real parameter  $\alpha_i$ . Assuming that external perturbations that could modify the value of  $T$  are negligible, the time evolution of the global temperature is given by:

$$\dot{T}(t) = \sum_{i=1}^S \alpha_i N_i(t) - T(t) \quad (3)$$

In order to induce a selective process, we assume that the system has a maximum carrying capacity  $K$ , the upper bound of the total population. Let the function of time,  $s(t)$ , be the available space at time  $t$ :

$$s(t) = K - N(t) \quad (4)$$

then, the global fitness of species  $I_i$  is given by:

$$\phi_i(s(t), T(t)) = s(t) f_i(T(t)) \quad (5)$$

At each time step, the reproduction rate of every species is a function of both the population size and the external temperature and becomes null as the population size approaches its maximum capacity  $K$ .

The time evolution of each species population  $N_i$  can be described by a system of Ordinary Differential Equation (ODE):

$$\dot{N}_i(t) = N_i(t)[\phi_i(t) - \delta_i] \quad (6)$$

for  $i = 1, 2, \dots, S$ . The parameter  $\delta_i$  is the death rate of species  $I_i$ . For sake of simplicity, if not explicitly indicated, we will assume in what follows that  $r_i = r_j \equiv r$  and  $\delta_i = \delta_j \equiv \delta$  for all  $i, j$ . Under these assumptions, species differ each other by their optimal temperature  $T_i$  and their capacity to modify the external temperature  $\alpha_i$ . Notice that, as all species have the same  $r$  value, we can redefine the fitness function  $f$  (see 2) including the common factor  $r$  in it, i.e. from now on:

$$f_i(T(t)) = f(|T(t) - T_i|) \quad (7)$$

It is convenient to normalize the equations with respect to the carrying capacity,  $K$ . Let  $x_i(t) = \frac{N_i(t)}{K}$  for  $i = 1, \dots, S$ . In so doing, we have to redefine the system parameters adequately:  $r^* = r K$  and  $\alpha_i^* = \alpha_i K$ , although, we keep the same notation in the equations:

$$\begin{cases} \dot{x}_i &= x_i \left( \left[ 1 - \sum_{i=1}^S x_i \right] f_i(T) - \delta \right) \\ \dot{T} &= \sum_{i=1}^S \alpha_i x_i - T \end{cases} \quad (8)$$

The non-linear character of this ODE system prevents its analytical solution. Nevertheless, a complete qualitative analysis for different cases has been carried out and it is presented in the following.

First of all let us find the equilibrium points. There are two possibilities to cancel the differential equation for species  $x_i$  in system 8. Either  $x_i = 0$ , or the parenthesis on the right vanishes, i.e.,

$$\begin{cases} \bar{T} = \sum_{j=1}^S \alpha_j \bar{x}_j \\ \begin{cases} \sum_{j=1}^S \bar{x}_j = \left(1 - \frac{\delta}{f(|\bar{T} - T_k|)}\right) & \text{for every } k \text{ such that } \bar{x}_k \neq 0 \\ \bar{x}_j = 0 \end{cases} \end{cases} \quad (9)$$

The local stability character of each of these equilibrium points is given by the Jacobian matrix associated to system 8, evaluated on them.

For every  $\bar{x}_l = 0$ , the  $l$ -row in the Jacobian matrix has only one non-null entry at the diagonal position  $J_{l, l}$ . Consequently, the associated corresponding eigenvalues are:

$$\lambda_l = \left(1 - \sum_{j=1}^S \bar{x}_j\right) f(|\bar{T} - T_l|) - \delta$$

In order to compute the rest of the eigenvalues, we only consider the ODEs that correspond to the values  $\bar{x}_j \neq 0$ . If we arrange these variables in the  $m$  last equations, we form a non-trivial box of dimension  $(m+1) \times (m+1)$  in the lower right part of the Jacobian. The equilibrium points of this subsystem verify:

$$\begin{cases} \bar{T} = \sum_{j=1}^m \alpha_j \bar{x}_j \\ \sum_{j=1}^m \bar{x}_j = \left(1 - \frac{\delta}{f(|\bar{T} - T_k|)}\right) \quad k = 1 \dots m \end{cases} \quad (10)$$

Note that this system of algebraic equations is inconsistent for large values of  $m$ . In practice, coexistence of more than two species is impossible, except in degenerate cases of species with the same optimal temperature, which we will consider indistinguishable. It is straightforward to prove that if  $T_r = T_s$  for a pair of species we can redefine the system using linear combinations of  $x_r$  and  $x_s$  in such a way that one of the combinations is stationary and the other behaves as a new species with an  $\alpha$  value that is a combination of  $\alpha_r$  and  $\alpha_s$  and the system behaves exactly as the one we are studying with one variable less.

When a solution exists, the associated Jacobian is straightforwardly computed. The entry  $J_{k, j}$  para  $k, j = 1 \dots m$  is given by:

$$J_{k, j} = -x_k f(|\bar{T} - T_k|) = -\frac{\bar{x}_k \delta}{1 - \sum_{j=1}^m \bar{x}_j} = F_k$$

The entries of the last column are ( $\forall k = 1, \dots, m$ ):

$$J_{k, m+1} = \bar{x}_k \left[ 1 - \sum_{j=1}^m \bar{x}_j \right] \frac{d}{dT} f_k(T) \Big|_{T=\bar{T}} = \delta \bar{x}_k \frac{d}{dT} \ln[f_k(T)] \Big|_{T=\bar{T}} = C_k$$

and the last row: 118

$$J_{m+1, k} = \alpha_k \quad \forall k = 1 \dots m, \quad J_{m+1, m+1} = -1$$

With this notation, the structure of the Jacobian is: 119

$$J = \left[ \begin{array}{cccc|c} F_1 & F_1 & \dots & F_1 & C_1 \\ F_2 & F_2 & \dots & F_2 & C_2 \\ \vdots & \vdots & \ddots & \vdots & \vdots \\ F_m & F_m & \dots & F_m & C_m \\ \hline \alpha_1 & \alpha_2 & \dots & \alpha_m & -1 \end{array} \right] \quad (11)$$

In the following sections we will study separately each of the equilibria and determine their stability conditions over the parameters, particularly, on  $T_i$  and  $\alpha_i$ . 120  
121

### 3 Fixed environment: $\alpha_i = 0$ for all $i$ 122

The reference case, that reduces the ODE system (8) to the classical error-free quasispecies model, corresponds to the situation when the species have no capacity to modify the temperature, i.e.  $\alpha_i = 0$  for all  $i$ . According to equation (8) temperature decreases exponentially from its initial condition to zero. When the stationary value has been reached, the fitness of all the species remains constant in time:  $f_i = f(|T_i|)$  and our model replicates the quasispecies model. It can be proven that asymptotic coexistence is not possible and only two non-degenerate equilibria exist: (i) Extinction, i.e. all the species of the population die out and (ii) Selection of only one species, whereas the rest disappear. The equilibrium of  $m$  different species requires the  $m$  species to comprise the same fitness, i.e.  $f_i = f_j$ , which is a degenerate situation. Obviously, neutral situations in which more than one species have the same fitness are possible but these species are considered as indistinguishable in this paper. 123  
124  
125  
126  
127  
128  
129  
130  
131  
132  
133  
134

The largest fitness corresponds to the species with optimal temperature  $T_i$  closer to zero,  $f(\min|T_i|)$  and, therefore this species (lets assume index  $k$ ) is the only one that can take over the whole population. Its equilibrium size is given by: 135  
136  
137

$$\bar{x}_k = 1 - \frac{\delta}{f(|T_k|)} = 1 - \frac{\delta}{f(\min|T_i|)} \quad (12)$$

From the qualitative analysis explained in previous section one can inferred that, as  $\alpha_i = 0$  for all  $i$ , the last row of the Jacobian has only one non-null entry,  $J_{S+1, S+1} = -1$ . Besides, for  $\bar{x}_i = 0$ , ( $i \neq k$ ) the corresponding rows in the jacobian matrix have again only a non-null entry,  $J_{i, i}$ . So the eigenvalues directly emerge: 138  
139  
140  
141

$$\lambda_i = (1 - \bar{x}) f(|T_i|) - \delta = \delta \left[ \frac{f(|T_i|)}{f(\min|T_i|)} - 1 \right]$$

As  $f$  is a monotonically decreasing function, all these eigenvalues are negative. 142

The row of the Jacobian corresponding to each surviving species reads as follows: 143

$$J_{k, j} = -\bar{x} f(\min|T_i|) \quad \forall j$$

and the corresponding eigenvalue is then: 144

$$\lambda = \delta - f(\min|T_i|)$$

If  $f(\min|T_i|) < \delta$  all eigenvalues are negative and this is the asymptotically stable state, whereas if  $\delta < f(\min|T_i|)$ , the final system tends towards extinction. 145  
146

## 4 Promoting coexistence by modifying the environment 147 148

Let us consider the case when the species are able to modify the environment ( $\alpha_i \neq 0$ ) and analyze the different possible stationary states. As we stated before, contrary to the quasispecies model, now coexistence equilibria of at most two species can occur. 149  
150  
151

### 4.1 Extinction 152

We consider first the equilibrium point:  $\bar{x}_k = 0$  for all  $k = 1, \dots, S$  and  $\bar{T} = 0$ , i.e. the extinction of the whole population. The analysis is similar to the preceding case  $\alpha_i = 0 \forall i$  and it is again straightforward to prove that this equilibrium point is asymptotically stable if 153  
154  
155  
156

$$f(\min|T_k|) < \delta$$

### 4.2 Only one survival 157

Let us assume that only one species has a population different from 0, for instance  $I_k$ . That is,  $\bar{x}_k > 0$  and  $\bar{x}_i = 0$  for all  $i \neq k$ . The equilibrium point is obtained from the system: 158  
159  
160

$$\begin{cases} \bar{T} = \alpha_k \bar{x}_k \\ \bar{x}_k = 1 - \frac{\delta}{f_k(\alpha_k \bar{x}_k)} = 1 - \frac{\delta}{f(|T_k - \alpha_k \bar{x}_k|)} \end{cases}$$

As  $\bar{x}_k > 0$  161

$$\delta < f_k(\alpha_k \bar{x}_k) \quad (13)$$

The eigenvalues associated to  $i \neq k$  are 162

$$\lambda_i = (1 - \bar{x}_k) f_i(\bar{T}) - \delta = \delta \left[ \frac{f_i(\bar{T})}{f_k(\bar{T})} - 1 \right] \quad (14)$$

The condition for this equilibrium point to be asymptotically stable is: 163

$$f_k(\bar{T}) > f_i(\bar{T}) \quad \forall i \neq k.$$

This last condition implies that: 164

$$f(|T_k - \alpha_k \bar{x}_k|) > f(|T_i - \alpha_k \bar{x}_k|) \quad \forall i \neq k$$

which means that the value of  $\bar{T} = \alpha_k \bar{x}_k$  must be closer to  $T_k$  than any other  $T_i$ . 165

At this point, as we will see later, it is convenient to reorganize the species according to their optimal temperatures, satisfying 166  
167

$$T_1 < T_2 < \dots < T_k < \dots$$

in a increasing succession as depicted in Figure 1. 168

The former condition reads now: 169

$$\frac{T_k + T_{k-1}}{2} < \alpha_k \bar{x}_k < \frac{T_k + T_{k+1}}{2} \quad (15)$$

The rest of eigenvalues are those of the submatrix in the Jacobian:

$$J = \begin{bmatrix} -\bar{x}_k f_k(\alpha_k \bar{x}_k) & \delta \bar{x}_k \frac{d}{dT} \ln[f_k(T)] \Big|_{T=\bar{T}} \\ \alpha_k & -1 \end{bmatrix}$$

The associated characteristic polynomial is:

$$\lambda^2 + [1 + \bar{x}_k f_k(\alpha_k \bar{x}_k)] \lambda + \bar{x}_k \left( f_k(\alpha_k \bar{x}_k) - \alpha_k \delta \frac{d}{dT} \ln(f_k(T)) \Big|_{T=\bar{T}} \right)$$

The equilibrium point is asymptotically stable if the two roots have negative real parts. 170

This occurs when: 171

$$f_k(\alpha_k \bar{x}_k) > \alpha_k \delta \frac{d}{dT} \ln(f_k(T)) \Big|_{T=\bar{T}}$$

### 4.3 Coexistence 172

Let us assume that the unique two survival species are  $I_k$  and  $I_m$ . The values of the equilibrium population are the solution of the algebraic system: 173  
174

$$\begin{cases} \bar{T} = \alpha_k \bar{x}_k + \alpha_m \bar{x}_m \\ \bar{x}_k + \bar{x}_m = 1 - \frac{\delta}{f_k(\bar{T})} = 1 - \frac{\delta}{f_m(\bar{T})} \end{cases} \quad (16)$$

The first obvious condition that must be satisfied is  $\delta < f_k(\bar{T})$ . 175

The right part of the second equation is satisfied if  $\bar{T} = \frac{1}{2}(T_k + T_m)$  or  $T_k = T_m$ . 176  
The second case can be reduced to the case studied in the previous section, again by 177  
using linear combinations of these two species. One of the new variables is stationary 178  
and the other behaves as a new species with an  $\alpha$  value that is a linear combination of 179  
 $\alpha_k$  and  $\alpha_m$ . 180

Let us focus on the first one:  $\bar{T} = \frac{1}{2}(T_k + T_m)$ . Eigenvalues associate to  $i \neq k, m$  are: 181

$$\lambda_i = (1 - \bar{x}_k - \bar{x}_m) f_i(\bar{T}) - \delta = \delta \left[ \frac{f_i(\bar{T})}{f_k(\bar{T})} - 1 \right] \quad (17)$$

Again, the condition for this equilibrium point to be asymptotically stable is: 182

$$f_k(\bar{T}) > f_i(\bar{T}) \quad \forall i \neq k, m.$$

Then,

$$f(|T_k - \frac{1}{2}(T_k + T_m)|) = f(|T_m - \frac{1}{2}(T_k + T_m)|) > f(|T_i - \frac{1}{2}(T_k + T_m)|)$$

which means that the value of  $\bar{T} = \frac{1}{2}(T_k + T_m)$  must be closer to  $T_k$  and  $T_m$  than any 183  
other  $T_i$  and, therefore,  $T_m$  y  $T_k$  must be consecutives, i.e.  $m = k + 1$  (Hence the 184  
convenience of arranging the species according to their optimal temperatures, as we 185  
stated before). 186

Now, the resulting linear system:

$$\begin{cases} \bar{x}_k + \bar{x}_{k+1} = 1 - \frac{\delta}{f_k(\bar{T})} \\ \alpha_k \bar{x}_k + \alpha_{k+1} \bar{x}_{k+1} = \bar{T} \end{cases} \quad (18)$$

can be straightforwardly solved yielding:

$$\begin{aligned} \bar{x}_k &= \frac{1}{\alpha_{k+1} - \alpha_k} \left[ \alpha_{k+1} \left( 1 - \frac{\delta}{f_k(\bar{T})} \right) - \bar{T} \right] \\ \bar{x}_{k+1} &= -\frac{1}{\alpha_{k+1} - \alpha_k} \left[ \alpha_k \left( 1 - \frac{\delta}{f_k(\bar{T})} \right) - \bar{T} \right] \end{aligned} \quad (19)$$

For these two concentrations to be simultaneously positive  $\bar{T}$  must have a value in between  $\alpha_{k+1} \left( 1 - \frac{\delta}{f_k(\bar{T})} \right)$  and  $\alpha_k \left( 1 - \frac{\delta}{f_k(\bar{T})} \right)$ .

As it will be proven next, asymptotical stability is discarded in the case  $\alpha_{k+1} > \alpha_k$ . For  $\alpha_k > \alpha_{k+1}$ , as both values in equation 19 must be positive 19, equation 18 implies:

$$\alpha_k(\bar{x}_k + \bar{x}_{k+1}) > \frac{1}{2}(T_k + T_{k+1}) > \alpha_{k+1}(\bar{x}_k + \bar{x}_{k+1})$$

The remaining three eigenvalues associated to this coexistence equilibrium are obtained from the reduced Jacobian matrix:

$$J_2 = \begin{bmatrix} -\bar{x}_k A & -\bar{x}_k A & \bar{x}_k B \\ -\bar{x}_{k+1} A & -\bar{x}_{k+1} A & -\bar{x}_{k+1} B \\ \alpha_k & \alpha_{k+1} & -1 \end{bmatrix}$$

where

$$A = f_k(\bar{T}) = f_{k+1}(\bar{T}).$$

and

$$B = \delta \frac{d}{dT} f_k(T) |_{T=\bar{T}}.$$

Notice that  $A > 0$  and  $B < 0$  as  $f_k$  is a decreasing function at  $\bar{T}$  (see Figure 1). The characteristic polynomial associated to  $J_2$  is:

$$\begin{aligned} &\lambda^3 + [1 + A(\bar{x}_k + \bar{x}_{k+1})] \lambda^2 + \\ &+ [A(\bar{x}_k + \bar{x}_{k+1}) + B(\alpha_{k+1} \bar{x}_{k+1} - \alpha_k \bar{x}_k)] \lambda + 2AB\bar{x}_k\bar{x}_{k+1}(\alpha_{k+1} - \alpha_k) \end{aligned} \quad (20)$$

The Routh-Hurwitz criterion requires the following conditions to assure three roots with negative real parts:

1. All coefficients are positives.

This implies that:  $\alpha_k > \alpha_{k+1}$  as stated before. In addition,

$$A(\bar{x}_k + \bar{x}_{k+1}) + B(\alpha_{k+1} \bar{x}_{k+1} - \alpha_k \bar{x}_k) > 0$$

- 2.

$$\begin{aligned} &[1 + A(\bar{x}_k + \bar{x}_{k+1})] [A(\bar{x}_k + \bar{x}_{k+1}) + B(\alpha_{k+1} \bar{x}_{k+1} - \alpha_k \bar{x}_k)] + \\ &+ 2AB\bar{x}_k\bar{x}_{k+1}(\alpha_k - \alpha_{k+1}) > 0 \end{aligned} \quad (21)$$



**Table 1.** 4-species model 1

| $\alpha$ | $T_{op}$ |
|----------|----------|
| -0.6     | -0.9     |
| -1       | -0.8     |
| 0.1      | -0.1     |
| -0.2     | 0.2      |

**Fig 2.** In order to describe the basins of attraction of the two 2-coexistence equilibrium solutions in the four species model with the parameter setup given in Table 1, we show a set of 1500 initial conditions and mark with red circles those that converge to the 2-coexistence between species  $I_3$  and  $I_4$  and with blue circles those initial conditions that converge to the 2-coexistence of species  $I_1$  and  $I_2$ . The rest of the parameter values are  $r = 1$  and  $\delta = 0.1$ .

These general conditions can be applied to seek examples where species coexistence exist. In particular, as shown in the next section, we will find examples where multi-stability between equilibria of coexistence appear and, consequently, the final population depends on the initial conditions.

#### 4.4 Four species model

In order to illustrate the results obtained in this section, we explore the numerical solution of several four species cases where multi-stability appears. This model of four initial species exhibits, among others, two kind of multi-stabilities that do not occur in the classical models: (i) bi-stability between two different coexistence equilibrium points and (ii) tri-stability among two single species equilibria and one coexistence point.

The first situation occurs for the species described in Table 1. The rest of parameters are  $r = 1$  and  $\delta = 0.1$ . The fitness function chosen for all the cases from now on reads

$$f_k(T) = r \exp [-(T - T_k)^2]$$

Among other equilibria, this model has the following two asymptotically stable equilibrium populations:  $(\bar{x}_1 = 0, \bar{x}_2 = 0, \bar{x}_3 = 0.7651, \bar{x}_4 = 0.1325, T = 0.05)$  and  $(\bar{x}_1 = 0.1243, \bar{x}_2 = 0.7753, \bar{x}_3 = 0, \bar{x}_4 = 0, T = -0.85)$ . The final equilibrium these four species will achieve depends on the initial population. In Figure 2 we show the projection on the plane  $\Pi$  (whose coordinate axis are  $x_1 + x_2$  and  $x_3 + x_4$ ) of the solution obtained for 1500 initial conditions, all with  $T(0) = 0$ . As it can be seen, the basin of attraction of each 2-coexistence is diffusively separated by the hyperplane  $x_1 + x_2 = x_3 + x_4$  that is projected as a line in the plane  $\Pi$ .

Another example of a case with four species that exhibits tri-stability is depicted in Table 2. The rest of the parameters is fixed as before.

**Table 2.** 4-species model 2

| $\alpha$ | $T_{op}$ |
|----------|----------|
| -1       | -0.9     |
| -0.7     | -0.85    |
| 0.1      | -0.1     |
| -0.2     | 0.2      |

**Fig 3.** As in the previous figure, we show the basins of attraction of the three equilibria that exist in the four species model presented in Table 2 a 2-coexistence and two 1-coexistence. A set of 1500 initial conditions are classified depending on their final equilibrium population: blue circles correspond to the 2-coexistence formed by species  $I_3$  and  $I_4$ , red circles to the 1-coexistence of species  $I_1$  and green circles to the 1-coexistence of species  $I_2$ . The other parameter values are:  $r = 1$  and  $\delta = 0.1$ .

Note that this example is a slight variation of the previous one, sharing the last two species. Nevertheless, among others equilibria, this model exhibits an unusual tri-stability among the following equilibrium points  
( $\bar{x}_1 = 0, \bar{x}_2 = 0.89, \bar{x}_3 = 0, \bar{x}_4 = 0, T = -0.626$ ),  
( $\bar{x}_1 = 0.89, \bar{x}_2 = 0, \bar{x}_3 = 0, \bar{x}_4 = 0, T = -0.9$ ) and  
( $\bar{x}_1 = 0, \bar{x}_2 = 0, \bar{x}_3 = 0.7651, \bar{x}_4 = 0.1325, T = 0.05$ ). This latter equilibrium already exists in the previous example.

In both cases, depending on the initial conditions the population tends to one of these equilibrium points. A tridimensional projection of 1000 initial conditions is depicted in Figure 3 where the coordinates axis are:  $x_1, x_2$  and  $x_3 + x_4$ . As it can be observed, the coexistence equilibrium has the largest basin of attraction (blue points). On the other extreme, the single species equilibrium with  $\bar{x}_1 > 0$  has the smallest basin of attraction (only seven red circles corresponding to 1-existence  $\bar{x}_1$  occurrences out of 1000 initial conditions).

## 5 Populations with a large number of species

In the previous section, we have studied the stability properties of a system formed by few species, concretely, four. We have proven the existence of conditions that yield multistability between single species and coexistence equilibria. Under these conditions, the asymptotic equilibrium population depends on the initial populations of each of the species that form the population. In this section, we explore further this dependence in populations formed by a larger number of species. An important result to be pointed out is that coexistence equilibria with more than two species does not exist. We want to show in this section how the asymptotic behavior of this kind of populations depends on three factors: (i) the number of species, (ii) the initial conditions and (iii) the confluence of the properties of the species that initially form the population, i.e. their optimal temperature  $T_k$  and the rate of influence,  $\alpha_k$ , over the environment temperature  $T$ .

### 5.1 Dependence with the number of species

In order to study the influence of the number of species that initially form the population, we carry out a numerical integration of the system of differential equations that describes the time evolution of each of the species population,  $x_k(t)$  (see 8). As before, we assume that each species  $I_k$  is characterized by  $T_k$  and  $\alpha_k$ . The values of these parameters are taken randomly from intervals whose length is changed in each case. The initial populations of all the species are equal and their sum reaches half of the total population, i.e.  $\sum_k x_k(t=0) = 1/2$ . The rest of the parameters that define the system are taken as before, i.e.  $r = 1, \delta = 0.1$ . For each number of species and for each  $\alpha$ -interval and  $T$ -interval, we perform 30 numerical integrations and quantify the equilibrium populations. The optimal temperature and the rate of influence of the initial species are randomly chosen from two given intervals that are symmetric with respect to 0:  $T_i \in [-T_{max}, T_{max}]$  and  $\alpha_i \in [-\alpha_{max}, \alpha_{max}]$ .

Figure 4 depicts the curves of the proportion of coexistence equilibria for the case

**Fig 4.** Relative frequency of the coexistence equilibria as a function of the number of initial species for different  $T$ -intervals. The interval of variation of  $\alpha_k$  is  $[-1, 1]$ . An initial population of  $N$  species with random values of  $T_k$  and  $\alpha_k$  in these intervals is considered. All the species are equally represented in the initial population that occupies half of the carrying capacity. The initial external temperature is  $T(0) = 0$ . Each point in the curves is the average over 30 realizations.

|                    |               | Number of initial species |      |      |      |      |      |      |      |      |
|--------------------|---------------|---------------------------|------|------|------|------|------|------|------|------|
|                    |               | 5                         | 10   | 20   | 30   | 40   | 50   | 60   | 80   | 100  |
| $\alpha$ -interval | $[-0.1, 0.1]$ | 0.15                      | 0.2  | 0.35 | 0.15 | 0.45 | 0.5  | 0.55 | 0.85 | 0.75 |
|                    | $[-0.5, 0.5]$ | 0.3                       | 0.45 | 0.75 | 0.75 | 0.65 | 0.95 | 0.8  | 1    | 1    |
|                    | $[-1, 1]$     | 0.53                      | 0.63 | 0.76 | 0.93 | 0.96 | 0.96 | 0.93 | 0.96 | 1    |
|                    | $[-2, 2]$     | 0.6                       | 0.65 | 0.95 | 0.95 | 0.95 | 0.95 | 1    | 1    | 1    |
|                    | $[-5, 5]$     | 0.5                       | 0.7  | 0.75 | 0.85 | 1    | 0.95 | 1    | 1    | 1    |
|                    | $[-10, 10]$   | 0.35                      | 0.7  | 0.7  | 0.9  | 0.9  | 0.85 | 0.95 | 0.85 | 0.95 |

**Table 3.** Frequency of the 2-coexistence equilibrium point for different intervals of variation  $[-\alpha, \alpha]$  as a function of the number of species  $S$ . The interval of variation of the optimal temperatures of the species is  $[-10, 10]$ . An initial population is selected of  $S$  species with random values of  $T_k$  and  $\alpha_k$  in these intervals. All the species are equally represented and the sum of their sizes occupies half of the initial population and the initial external temperature is  $T(0) = 0$ . Each value is the average over 30 realizations.

$\alpha$ -interval =  $[-1, 1]$  for different  $T$ -intervals. The rest of the proportion corresponds to single species equilibria except for the large  $T$ -intervals and lower number of species where the proportion of extinction is significant (see Figure 4). For the other  $T$ -intervals this proportion is null. As it can be seen, the occurrence of 2-coexistence equilibria is more probable for population formed initially by a large number of species. This tendency is more effective when the  $T$ -interval is shorter. On the contrary, this proportion is reduced to half when the  $T$ -interval is  $[-10, 10]$  even for large number of species.

Similar results are obtained when the  $T$ -interval is fixed to  $[-10, 10]$  and we vary the length of  $\alpha$ -interval as it is summarized in Table 3. In that table the probability of reaching a 2-coexistence equilibrium as a function of the number of initial species is shown. In this case, the probability of extinction is null and, consequently, the probability of survival of only one species for each number of initial species is 1 minus the value given by the corresponding curve. As in the previous figure, it can be seen that the coexistence equilibria are more likely to occur in populations with larger number of species. This effect is more important when the  $\alpha$ -interval is larger.

## 6 Discussion

The capability of some species to modify the environment has been postulated as a factor of stabilization that can promote biodiversity [3]. The coupling between biota and the environment could endow the ecosystem with homeostatic properties that enables a better adaptation [5, 17]. The Gaia hypothesis is mainly based on this interaction [18, 19]. Indeed, Evolution favours those species that are able to keep the environment under specific conditions that are assumed good enough for Life.

A huge debate exists about the evolutionary occurrence of this kind of interactions between evolving species and an environment governed by the Laws of Physics. Hypothetically, biological species would be selected to fit particular environmental conditions. This would require, of course, a certain stability of the environment that, in

evolutionary time, has not always occurred. However, our planet Earth has abruptly  
changed its physical properties from the origin of Life. Likely, most of the species that  
were selected in a static environment could be later displaced by new environmental  
conditions. Thus, it can be said that darwinian evolution is acting constrained by the  
dynamics of the environment. As a consequence, evolution selects species with the  
capability of controlling the rapid and drastic changes of the environment in their own  
benefit. The problem is how to explain the fixation of a systemic property from the  
selective pressure on the individuals of the population [17, 20–22]. Even more  
challenging is to explain the existence of stable populations when mutation enables the  
appearance of species that can drive the environment towards destabilization.

This paper shows that when species are able to modify the environment, coexistence  
can be enhanced. As a matter of fact, for populations with a large number of species,  
coexistence is the most probable equilibrium population. However, if this modification  
is not coupled with the own species characteristics then, this capability does not assure  
its own persistence. The question about which species will survive under specific  
conditions can not be answered exclusively by carrying out a stability analysis.  
Qualitative stability analysis, for instance, based on the linearization around equilibria  
only provides local information about the dynamics of small perturbations: if the  
perturbation decays the equilibrium points are said to be asymptotically stable. On the  
contrary, if the perturbation increases over time the equilibrium point is said unstable.  
When the system exhibits multiple equilibrium points this analysis cannot solve the  
asymptotic behaviour when the population starts from a particular initial condition.  
Linear stability analysis says nothing about the attraction basin. Nevertheless, we have  
got a useful result, proven in section 4, that states a necessary condition that must  
satisfy two species that coexist in equilibrium: their temperatures must be consecutive.  
Unfortunately, this condition is not conclusive and further investigation is required to  
predict the species selected from a given initial population.

In order to solve this problem, we have applied a different approach that seeks to  
determine the equilibrium point (asymptotically stable) which is achieved from an  
initial population. In particular, we assume that the species optimal temperatures and  
their rate of influence on the environment are randomly taken. The population starts  
with a given number of species homogeneously populated and whose sum is well below  
the carrying capacity of the system  $K$ . After a transient period large enough to assure  
the system relaxation, we take note of the survival species and analyse their properties.  
We check that all these equilibria are asymptotically stable by a qualitative analysis. As  
expected, depending on the values of the external temperature the equilibrium  
population may differ. We note that most of the equilibrium populations are  
coexistence of two species that present a definite relationship between their optimal  
temperature  $T_k$  and the rate of influence on the environment  $\alpha_k$ , concretely  $T_k \alpha_k < 0$ .  
Few simulations yield with the survival of only one species. None, as expected, with  
more than three species.

The deterministic description provided by Ordinary Differential Equations (ODE)  
assumes a negligible internal noise, i.e. a large population size. This is the case when  
the carrying capacity  $K = 10^5$  and the initial population sizes are  $x_i(0) = 5 \times 10^2$  for  
 $i = 1, \dots, S$ , values that are applied in most of the computations. To check that this  
approach is correct we have also simulated the dynamic of the population by using an  
individual-based algorithm (data not shown). We simulate a discrete population in  
which each individual can be chosen either to replicate or to die according to its  
(global) fitness. We note that for this value of  $K$  the results of these simulations agree  
in all cases with the numerical integration of the ODE system. On the contrary, we  
have detected some differences for small values of  $K$ . This effect could be relevant when  
considering mutation because mutants populations are very small at the first stages

after appearance. 344

## 7 Concluding remarks 345

The stability of populations is a key issue in Ecology. Grimm and Wissel (1997) stressed the large number of definitions that have appeared in Ecology [23]. These definitions are classified into six classes that resume the concepts frequently used in this field: constancy, resilience, persistence, resistance, elasticity, and domain of attraction [24]. In some point or another all of them appear in this work. Specifically, we handle with persistence when studying the species that remain in the population after a period of time. Mathematical stability, as shown in section 2, provides information about the local resilience and, in addition, enables to estimate the domain of attraction of equilibria [7]. In contrast, this stability analysis does not inform about the persistence of the species composition of an initial population that change over time due to the existence of multiple stable equilibria [25]. In other words, this approach can not predict the equilibrium point to which the system will tend. The consideration that species can modify the environment and, as a consequence, the composition of the population, includes an extra difficulty to perform a qualitative analysis and prevent an analytical solution of the problem. Numerical integration and simulations are instead appropriate tools for solving this problem as it is shown in this paper. 346 347 348 349 350 351 352 353 354 355 356 357 358 359 360 361

An important subject to be handled in a forthcoming paper concerns the evolutionary properties of this kind of ecosystems. We have assumed that the mutation rate of the species is null and consequently we have avoided the appearance of new species in the population. In this kind of models that consider the ability of species to modify the environment, the appearance of a new species with influence on the environment can have important consequences on the equilibrium properties [16]. The induced new conditions change the relative fitness of the species and, therefore, changes the final outcome of the selective process. This modification can stabilize the population by endowing the species with a larger survival probability or, on the contrary, it can destabilize the population by pushing the external temperature out of the limits of survival of the existing species. In the latter case, this induced-variation can drive the population to extinction. In any case, absolute stability does not exist in these models. The possibility of modifying the environment is an additional factor that contributes to keep open forever the fate of evolution. 362 363 364 365 366 367 368 369 370 371 372 373 374 375

## References

1. Eigen M. Self-organization of matter and the evolution of biological macromolecules. *Die Naturwissenschaften*. 1971;58:465–523.
2. Watson AJ, Lovelock JE. Biological homeostasis of the global environment: the parable of Daisyworld. *Tellus B*. 1983;35:284–289.
3. May R, McLean AR. *Theoretical Ecology: Principles and Applications*. Oxford Univ. Press; 2007.
4. Loreau M, de Mazancourt C. Biodiversity and ecosystem stability: a synthesis of underlying mechanisms. *Ecology Letters*. 2013;16:106–115.
5. Lovelock JE. A numerical model for biodiversity. *PhilTransRSocLond B*. 1992;338:365–373.
6. Brookfield JFY. Predicting the future. *Nature*. 2001;411:999.

7. Menck PJ, Heitzig J, Marwan N, Kurths J. How basin stability complements the linear-stability paradigm. *Nature Physics*. 2013;9:89–92.
8. Arnoldi JF, Haegeman B. Unifying dynamical and structural stability of equilibria. *Proc of the Royal Society A*. 2016;472:2193.
9. Hellman F, Schultz P, Grabow C, Heitzig J, Kurths J. Survivability of Deterministic Dynamical Systems. *Scientific Reports*. 2006;6:323–334.
10. Wood AJ, Ackland GJ, Dyke JG, Williams HTT, Lenton TM. Daisyworld: A review. *Rev Geophys*. 2008;46:1001.
11. Wilke CO, Forster R, Novella IS. Quasispecies in Time-Dependent Environments. *Current topics in microbiology and immunology*. 2006;299:33–50.
12. Nilsson M, Snoad N. Error thresholds for quasispecies on dynamic fitness landscapes. *Physical Review Letters*. 2000;84:191–194.
13. Gentry SN, Jackson TL. A Mathematical Model of Cancer Stem Cell Driven Tumor Initiation: Implications of Niche Size and Loss of Homeostatic Regulatory Mechanisms. *PLoS ONE*. 2013;8(8):1–15.
14. Roy J, Albert CH, Ibanez S, Saccone P, Zinger L, Choler P, et al. Microbes on the cliff: alpine cushion plants structure bacterial and fungal communities. *Frontiers in Microbiology*. 2013;4:1–14.
15. Rosenzweig C, Karoly D, Vicarelli M, Neofotis P, Wu Q, Casassa G, et al. Attributing physical and biological impacts to anthropogenic climate change. *Nature*. 2008;453:353.
16. Nuño JC, de Vicente J, Olarrea J, López P, Lahoz-Beltrá R. Evolutionary Daisyworld models: A new approach to studying complex adaptive systems. *Ecological Informatics*. 2010;5:231–240.
17. Doolittle WF. Darwinizing Gaia. *Journal of Theoretical Biology*. 2017;434:11–19.
18. Lovelock JE. *GAIA: a new look at life on Earth*. Oxford Univ. Press; 1979.
19. Kirchner JW. The Gaia Hypothesis: Fact, theory and wishful thinking. *Climatic Change*. 2002;52:391–408.
20. Downing KL, Zvirinsky P. The Simulated Evolution of Biochemical guilds: Reconciling Gaia Theory and Natural Selection. *Artificial Life*. 1999;5:291–318.
21. Robertson D, Robinson J. Darwinian Daisyworld. *Journal of Theoretical Biology*. 1998;195:129–134.
22. Saunders PT. Evolution without natural selection: further implications of the Daisyworld parable. *Journal of Theoretical Biology*. 1994;166:365–373.
23. Grimm V, C W. Babel, or the ecological stability discussions: an inventory and analysis of terminology and a guide for avoiding confusion. *Oecologia*. 1997;109:323–334.
24. Mitra C, Kurths J, Donner RV. An integrative quantifier of multistability in complex systems based on ecological resilience. *Scientific Reports*. 2015;5:16196.
25. Petraitis P. *Multiple Stable States in Natural Ecosystems*. Oxford Univ. Press; 2013.

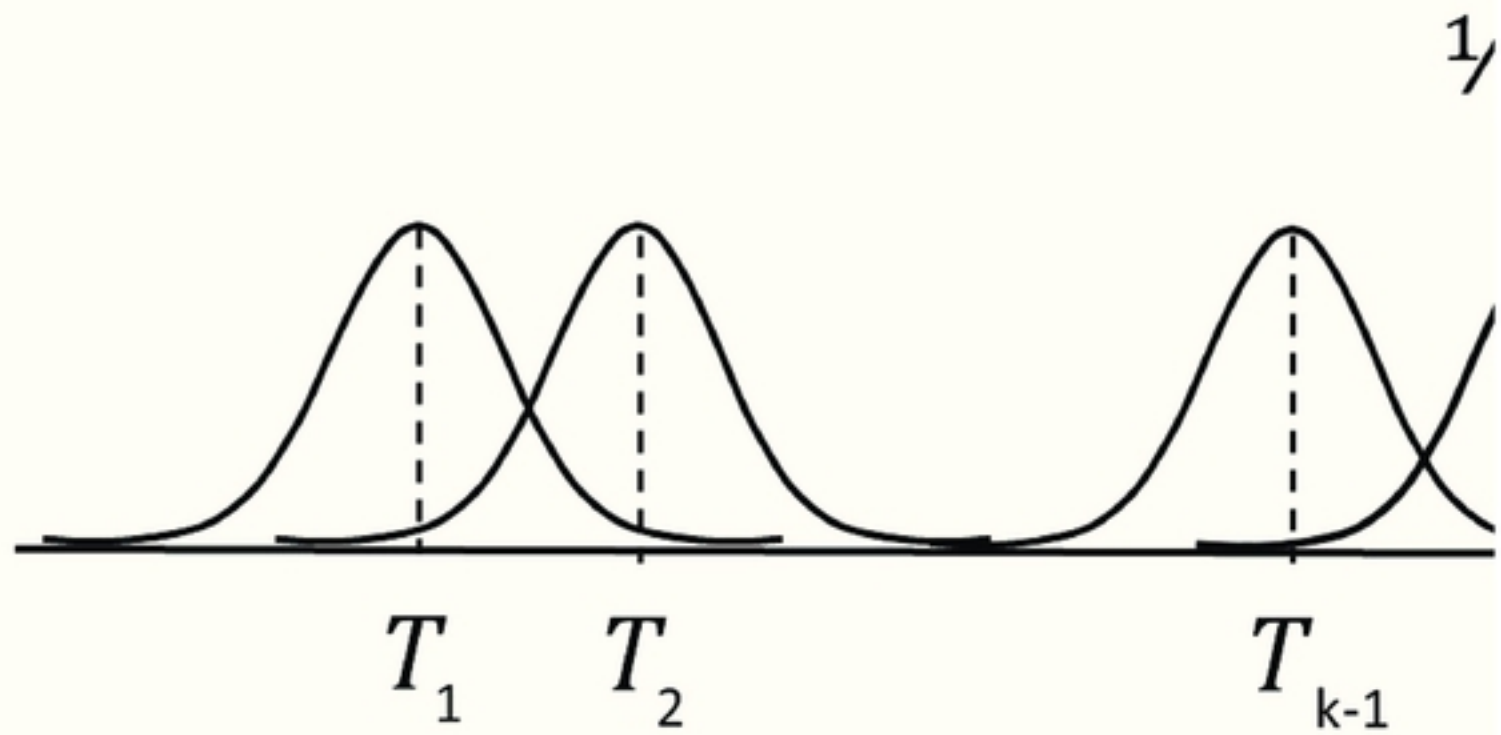

Figure



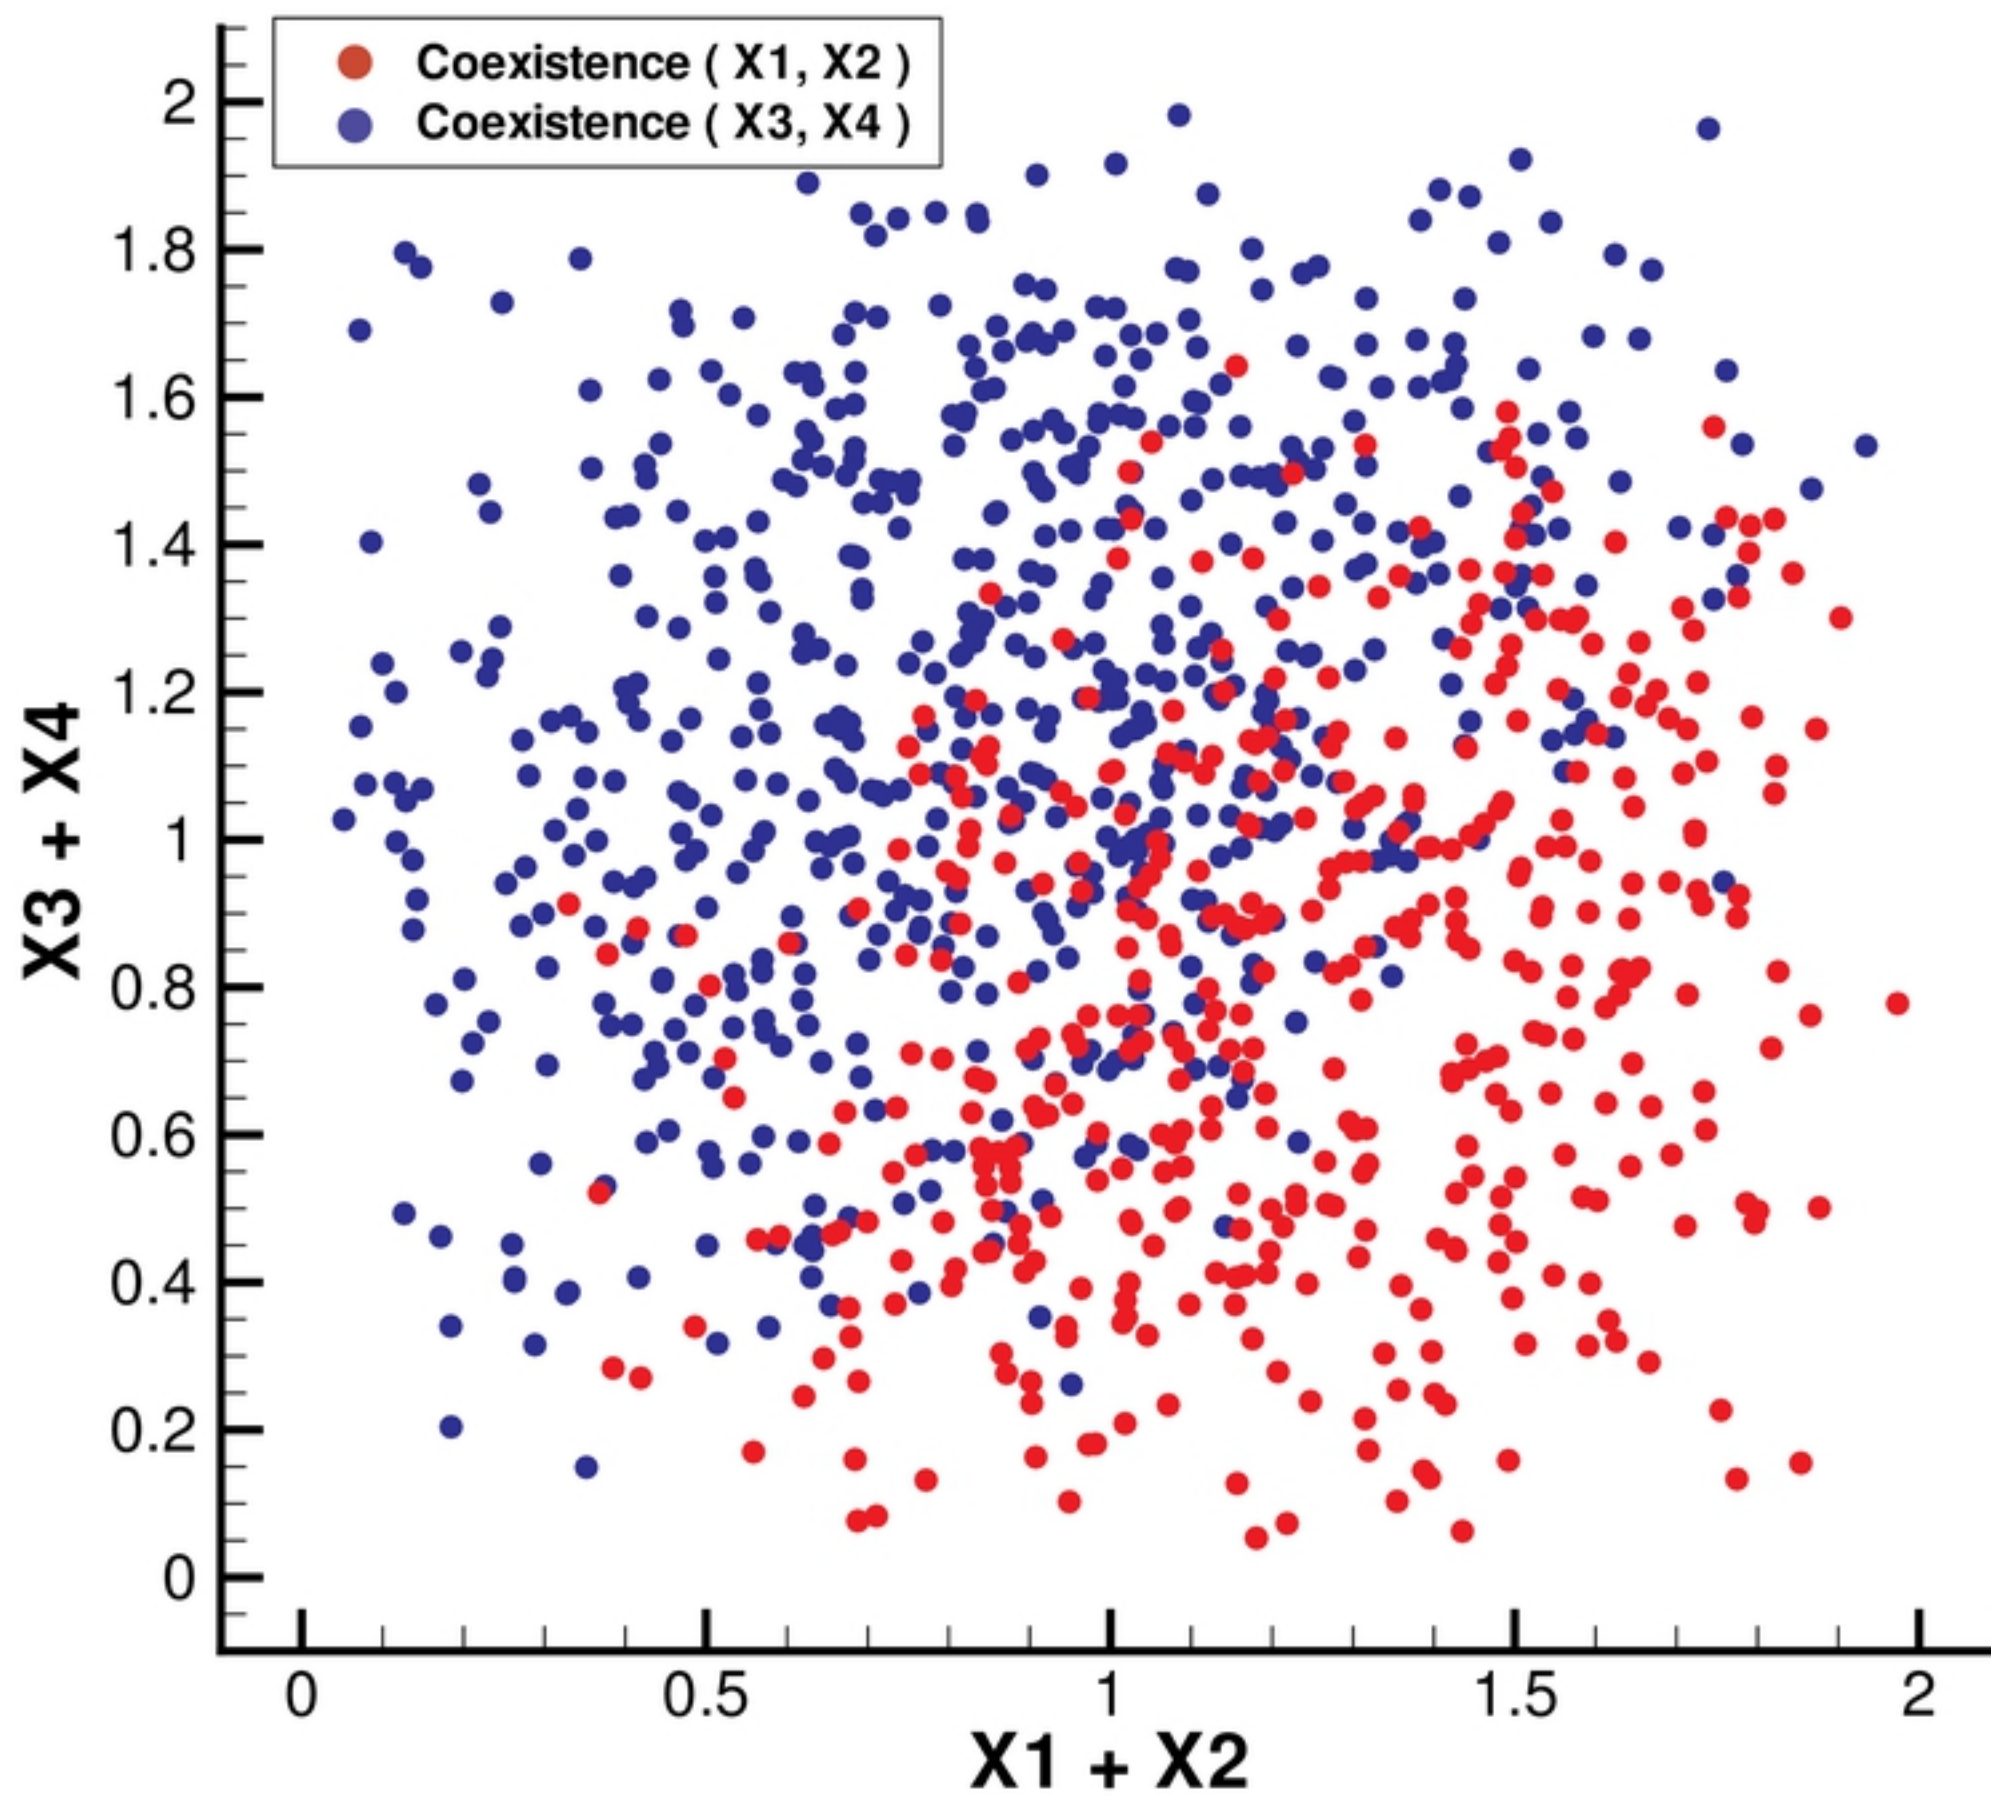

Figure



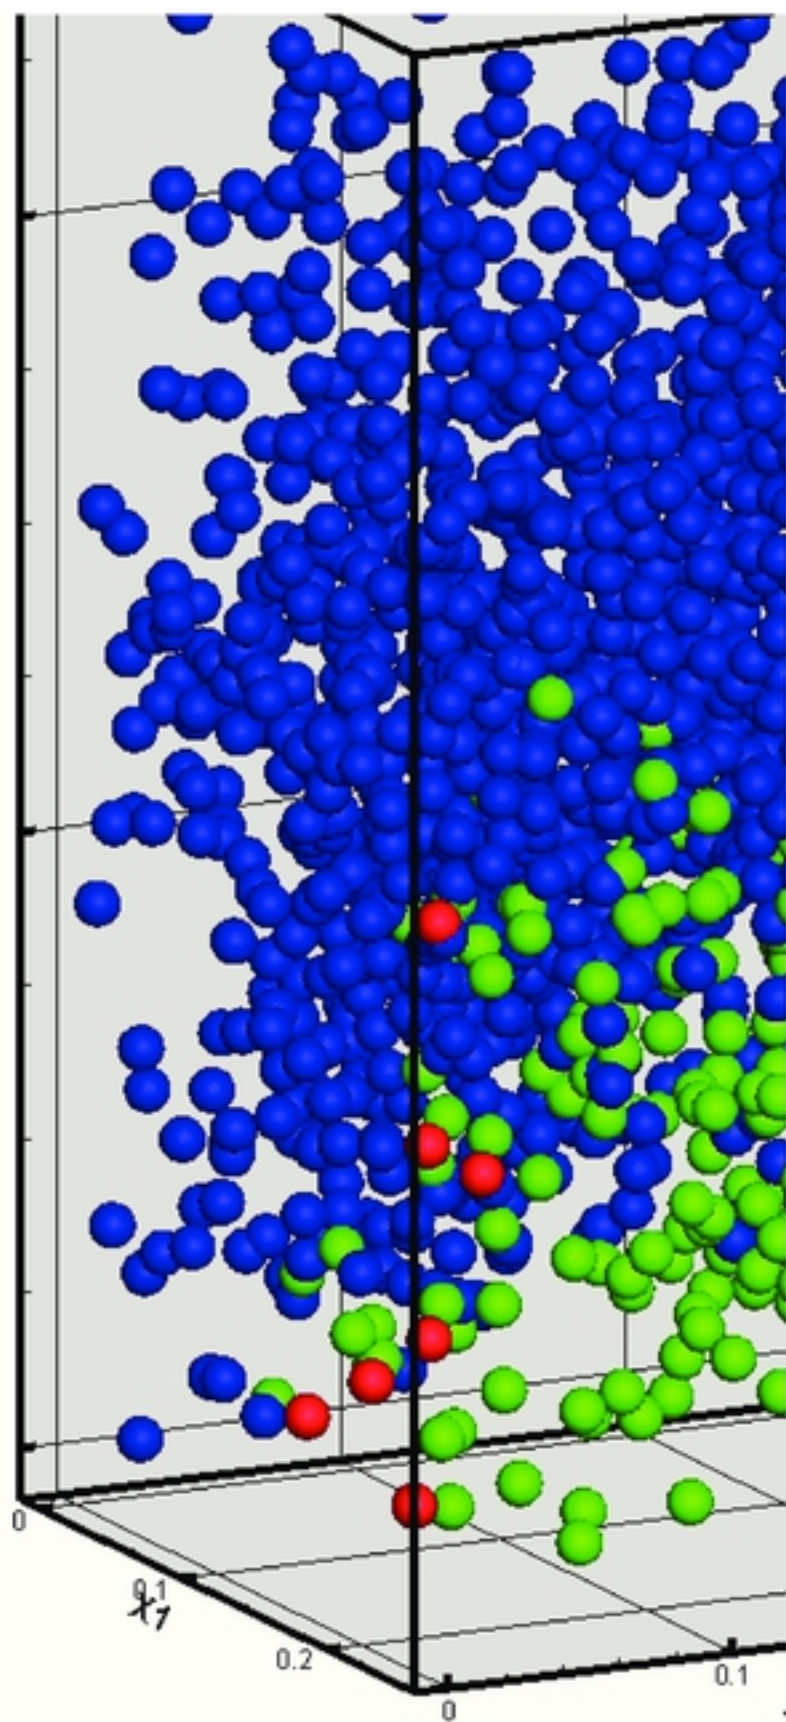

Figure

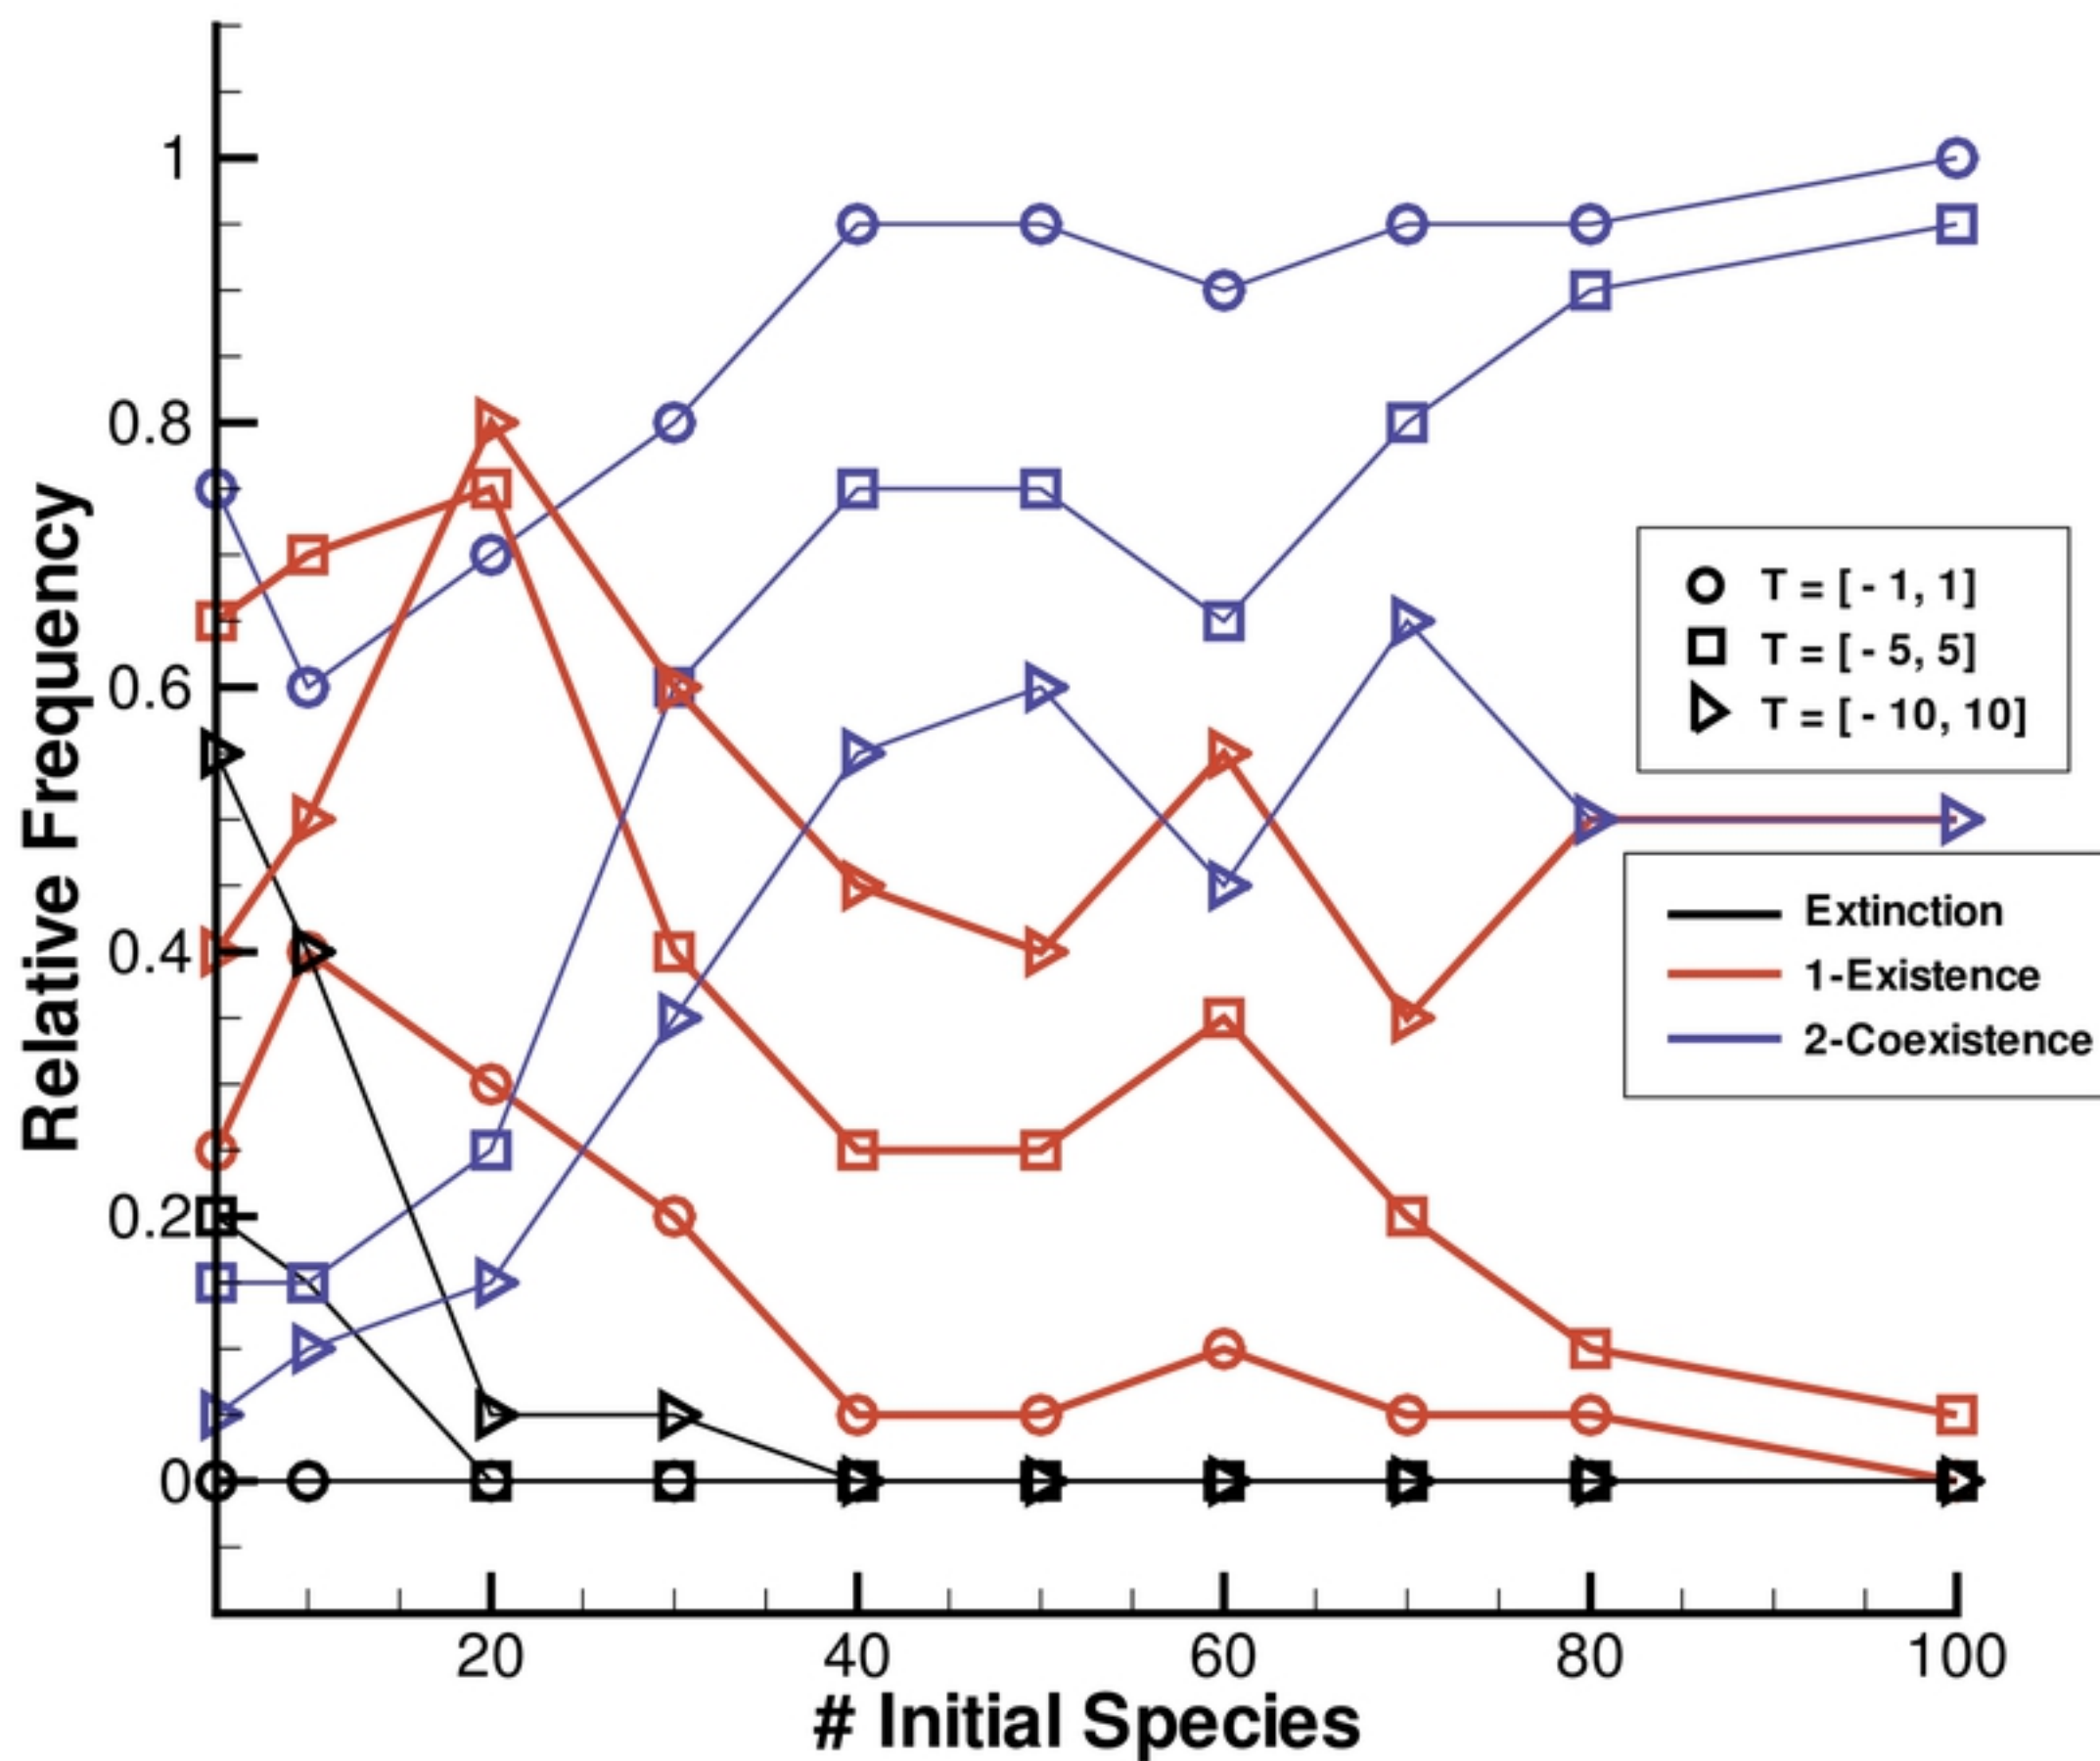

Figure
